# Supplementary material for: Efficient and Stable Delivery of Multiple Genes to Fish Cells by a Modified Recombinant Baculovirus System
Source: PubMed Central journal article supplement (PMC6321422; doi:10.3390/ijms19123767), 2018-11-27
Supplement: ijms-19-03767-s001.pdf [file ijms-19-03767-s001.pdf]

# Supplementary Figure 1

Detailed map and sequence of modified plasmid pFastBac-CMV-ie1-pr.

- multiple cloning site
- CMV enhancer + CMV promoter
- WSSV ie1 promoter
- PuroR (puromycin N-acetyltransferase)
- DsRed

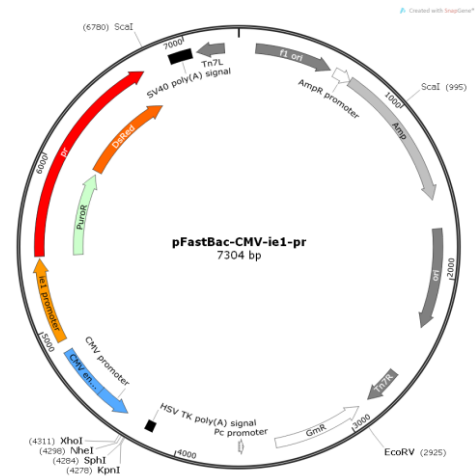

ttctctgtcacagaatgaaattttctgtcatctcttctgtaatttaattggttaattgactgaatacaacgcttatttgacgctgaatggcgaatgggacgcgccctgtagcggcgcaatgacgcg  
ggcgggtgtggtggttacgcgacgctgaccgctacactgaccgagccctagcggcctctctcttctctccctcttctctccacgcttcccgctcaagctctaaac  
ggggctcccttaggggtccgatttagtctttagcgttaccgaccccaaaaactgattagggtgatggttcacgtagtggccatcgccctgatagacggttttcgccctttgacgttgg  
agtcacgttcttaatagtgactctgttcaaacggaacaacactcaacctatctcgtctattctttgattataagggatttgcgattcggcctattggttaaaaaatgagctgattaa  
caaaaattaacgcaattttaaaaaaataaacgtttacaattcagggtgacactttcggggaatgctgcggaaccctattgtttatfttaataatcattcaaatatgatccgctcatgag  
acaataacctgataaatgtcaataatgaaaaaggaagagtatgagtattcaacttccgtctgccccttattcccttttgcgcatttgccttctgttttctcaccagaaacgctg  
gtgaaagtaaaagatgctgaagatcagttgggtgcacaggtgggtacatcgaactgactcacaacgctgaagatcctgtgagagtttcccccgaagacgtttccaatgatgacactt  
ttaaagtctctatgtggcgggtattatccgtattgacggcgcaagcaactgctgcgcacatactattctcagaatgactgggtgactaccagtcacagaaaacatctt  
acggatggcatgacagtaagagaattatgcagctgctccataaccatgagtataacactgcggcaacttactctgacaacgatcggagaccgaaggagcctaacgctttttgcacaa  
catgggggatcatgtaactgccttagctgttggaacccgagctgaatgaaccatacaaacgacgagcgtgacaccacgatccctgagaatggcaaacactgacgcaaacattat  
actggcgaactactactgactgtcccggcaacaataatagactggatggaggcgataaagttgacagaccactctctgcctcggccctccggcgtgctgttattgtatgataactg  
agccggtgagcgtgggtctcgggtatcattgacgactggggccagatggttaaccctccgtatctgtattctacacgacgggagtcaggcaactatggatgaacgaaatagacag  
atcgtgagataggtgctcactgattaagcattgtaactgtacaccaagttaactcatatatactttatgatttaaaacttatttaatttaaaagactaggtgaaatccttttgataat  
ctcatgacaaaactcctaacgtgagtttctgctcactgagcgtcagaccctgaaagaatcaaaagatctcttgatcctttttctgcccgtaatctgctgctgcaaaaaaac  
caccgctaccagcgggtggtttgcttccggatcaagactaccaactctttccgaaggtaactgcttccagcagcgcagatacaaaactgtcttctagtgagccgtagtagccac  
cactcaagaactctgtaccgctacatactcgtctgtctaatctgtaccagtgctctgcccagtgccgataagtcgtcttaccgggtggactcaagacgatgaccggataa  
ggcgagcggctgggtgaacgggggttctgcacacagccagcttggagcgaacgactacacgaactgagatacctacagcgtgagcattgaaagcggccacgcttcccga  
gggagaaagcggacaggtatccggtaagcggcagggctggaacagagagcgcagagggagctccagggggaaacgctgfatcttatactctgctggttccgccactctg  
actgagcgtcattttgtatgctcgcagggggcggagcctatgaaaaacccaacgacggccttttacggttctgcttctgctgcttcttctcatgttcttctgctgtt  
cccctgattctgtgataaccgtattaccgctttgagtgagctgataccgctcggcagccgaacgaccgagcgcagcagtcagtgcagcaggaagcggaaagcggcctgatcgg  
tattttctcttacgcatctgctggtatttcacaccgcagaccagccgtaacctggcaaatcggttcagttgagtaataatggatccctgcgtaagcgggtgtggcggacaataaa  
gtcttaactgaacaaaatagatcaaaactatgacaataaagtctaactagacagaatggttaaactgaaatcagtcagttatgctgtaaaaaacatactggactttgttatggctaaag  
caaaccttctatttcaagtcaaaatgccgctgctttaaagggcgctgccaagggcatgtaaaagataattcgcggcgttgacaattaccgaacactccggccgggaa  
ggcagctcggctgaacgaattgttagtggcgtactggctgatacaaaagtcactctctcccgtatgcccaactttgatagagaccactgcgggactgcaccgtaactctgctg  
cacgtatgacataagaccaagcggcttggcctcatgctgaggagattgagcgcggtgcaatgcccctgctcgggctcgggagactgcgagatcatagatatagatctca  
ctacggctgctcaaacctggcgaacgtaagcggagagcggcaacaaccgcttctggtcgaaggcagcaagcgcgatgaatgcttactacgggaagtccggaggtaatcg  
gagtcggctgatggtggagtaggtgctactctccgaactcagaccgaaagatcaagagcagcccagtgattgacttggcagggccgacctatgctgaatgatccca  
tactgaccacctaacttttttagggcactccctgctcgtaaacatgctgctgctgtaaacatgctgctgctccataacaatcaaacatcgaaccacggcgtaacgcttctgctg  
gatcccggagcatagactgacaaaaaacgtatacaaacgcaatgaaaaccgcaactgcccgtaccaccgctgctgctgctcaaggtctgaccagttcgctgagcgcatacgt  
actgcaatcagtttcaacccaagcgttatgtaactgggtcgtgcttccctaccgggtgctgctcaccggcgaaccttggcagcagcaagtcagggacttctgctgct

ctggcgaacgagcgcaaggttcggctccacgcatcgcaggcattggcgccctgctgcttctctacggcaaggtgctgtgcacggatctccctggctcaggagatcggtgacctcg  
gccgtcggcgctgccgggtgctgacccggatgaagtgttcgcatctcggtttctggaagcgagcatcgtttgtcggcaggactctagctatgctagtgttgccctacg  
taccctagtggctatggcagggtgccccccgacgttgctgcgacccctggcctcaccgaactgggggtgggggtgggaaaaaggaaaacggggcgctattgtgccc  
tgggtctcgggtgggtatcgacagagtgccagccctgggaccgaaccccggttatgaacaacgaccaacacccgtcggtttatctgctttttatgccgctatagcggggtctt  
ccggtattgtctctccgtgttcagttagctccccatctcccgtaccgcatgctatgcatcagctgtagcaccatggctcggatctgacggttactaaacggctctgcttatataga  
ctcccaaccgtacacgcctaccgcccaattgctcaacggggcggggttattacgacatttggaaagtcctgttatttggfccaacaaaccccaattgacgtcaatgggggtgagact  
tggaaatccccgtgagcaaacgctatcacgcccaattggtgactgcaaaacgcatcaccatgtaatagcgatgactaatactagatgactgcaagtaggaaagtcctgtaaggt  
catgactggcataatgccaggcgggcatttaccgtcattgacgtcaatggggcgggacttggcatatgatacactgatgactgccaagtggcgacttaccgtaaaactccaccat  
tgacgtcaatggaaagtcctattggcgttactatgggaacatacgtcatttattgacgtcaatggggcggggtctgtggcggtcagccaggcgggcatttaccgtaagttaaacgg  
aacctatataatggctatgaactaatgacccgtaattgattactatfaataactagatgctgtggcctaattggagaattgtcgtccagtgtatcagcaagcgagatgctgggtggcgt  
ggcctcaatattgcatcactctcttctgactcatctgatgccagatgggtgctaaacgggagatttactcctacttctgtgacgcacataataaccacattgaggtttaa  
agaaagcagttgtccgctccctagaccatccctaaagtgagatttfaatgctccgaaaaaattgagacttactatcgacatgtttatctgaggggtatcaaccacagtggaact  
tgcagatgaaaaatggctgttgaatcatgtaaggaattccttgttactcatttattctagaatgggttaactcgtgttggcgaggacatattgtgtatataagcccgtgttagctctcga  
ttcagtcacaagagcgcaacacacgcttataactagctctctccactcaaggaaatgccaccatgaccgagtaacaagcccaggtgcgctcggcaccggcagcagctccccgg  
ggcgtacgacccctcggccgctcggcactaccggccacgcgcaacacgtcaccggaccgacacatcgagcgggtcaccgagctcaagaactctctcaccgctcgtc  
ggctcagatcggcaaggtgtggtcgcggagacgcccggcgggtgctgaccacggcgagagcgtcgaagcggggcggtgttcgccgagatcgcccgcgcatggc  
cgagttgagcgggtccggctgcccgcgcaacaagatgaaagcctctgctcggcggcaccggcccaagggcggcgtgttctgcccacgtcggcgtcgcggaccacca  
ggcgaagggctggcagcggcgtcgtctcccgagtgagggcggcggcggcgggggtgccccttctggagacctccgccccgcaacctccccctctacgagcggct  
cggcttaccgtcaccggcagctcaggtgcccgaagggaccgacacctggtgcatgaccgcaagcccgggtgcccactagctgggatccaccggtgccaccatggctcctc  
aagaacgcatcaagaggtcagctcaaggtcagatggaggcaccgtgaacggccacagatcagatcagggcgaggcgaggcccccctacgaggccacaacacc  
gtgaagctgaaggtgaccaagggcgccccctgcttgcctgggacatctgtcccccagttccagtagcgtccaaggtgactgaaagcaccggcagatccccgaactaag  
aagctgtcctccccgaggctcaagtgaggcgcgtgatgaactcaggacggcggcgtgtgacctgacccaagactcctcctcaggaagcgtgcttcatcaaggtgaag  
tcatcggcgtgaactccccctcagggccccgaatgcagaagaagacatggcgtggaggcctcaccggagcggctgtacccccgcagcggctgctgaaggcgagatccaca  
ggcctgaaagctgaaggacggcgccactactgtggaggtcaagtcactatcatgccaagaagcccgtgcagctgcccggctactactagtgactccaagctggacatcac  
ccacaacgaggactacacatcgtggagcagtagcgcgaccgaggccaccacctgttctgtagcggccgttctgaatctagacgtcagctcgcagaagctgtcgagaag  
tactagagatcaatacaaccatacccaattgtagaggtttacttcttataaaactcccacacccccctgaacctgaacataaaatgaatgcaattgtgttactgtttatgca  
gctataatggttacaataaagcaatagcatcaaaattcacaataaagcaatttttactgacttctgtgtgttgcacaaactcaatgtatcttactgtctgactgactgctt  
gagcctaggagatccgaaccagataagtgaaatctagttccaaacttttgcatttttaatttctgattagcttacgacgtacaccagttcccatctatttgcactctccctaaataactta  
aaaaactcaattccaccctccagttcccaactatttgcgccacagcggggcatttttctctgttatgttttaatacaacatctgccaactcatgtgacaacccgtacatctcggtact  
tt

## Supplementary Figure 2

Detailed map and sequence of modified plasmid pFastBac-*ie1*-CMV-pf.

**EGFP**

**PuroR (puromycin N-acetyltransferase)**

**CMV enhancer + CMV promoter**

**WSSV *ie1* promoter**

**multiple cloning site**

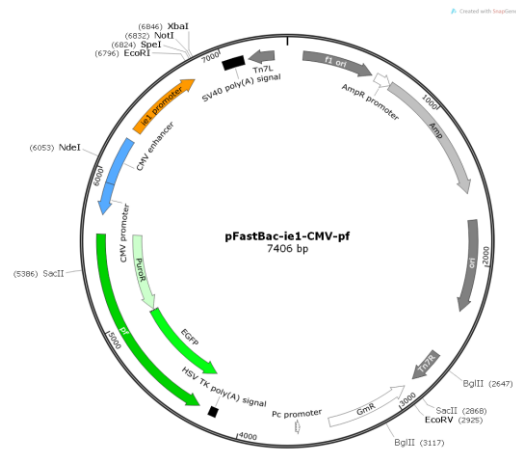

ttctctgtcacagaatgaaaattttctgtcatctctcgttattaatgfttgaattgactgaatatcaacgcttattgcaagcctgaatggcgaatgggacgcgccctgtagcggcgcaatgagcgc  
ggcggggtggtggttacgcgcagcgtgaccgctacactgccaagcgccttagcggcctctctcgttctccctctcttctcggccacgttcgccggcttccccgtcaagctcaaatc  
ggggcctcccttaggggtccgatttagtctttagcgcacctcgcaccccaaaaactgattagggtgatggtcacgtagtgggcatcgcctgatagacggtttcccttgacgttgg  
agtccacgttcttaatagtgactctgtccaaactggaacaactcaacctatctcgtctattctttgattataaggatttgcgatttcggcctattgtaaaaaatgagctgattaa  
caaaaattaacgcgaatttaacaaaatataacgtttacaattcaggcgcactttcgggaaatgtgcgcggaaccctattgfttattttcaaatatcattcaaatatgtatccgctcatgag  
acaataacctgataatgctcaataatgtaaaaaggagagatgagattcaacttccgtctcgccttattcccttttgcggcatttgcctctctgttttctcaccagaaaagcgtg  
gtgaaagtaaaagatgctgaagatcagttgggtgcacgagtggttacatcgaactgcatcacaagcggtaagatcctgagagtttcccccgaagaacgtttccaatgatgagcactt  
ttaaagttctgctatgtggcgcggtattatccgtattgacccggcaagagcaactcgtcggcgcacatactattctcagaatgactgggtgagtagtaccagtcacagaaaagcactt  
acggatggcatgacagtaagaatgatgctgctccataacatgagtgataacactcggccaacttactctgacaacgatcggaggaccgaaggagtaaccgctttttgcacaa  
catgggggatcatgtaactcgcctgatcgttgggaaccggagctgaatgaaccataccaacgacgagcgtgacaccacgatgcctgtagcaatggcaacaacgttgcgcaaacattta  
actggcgaactactactctagcttccggcaacaataatagactggatggagcggataaagttgcaggaccactctgcctcggccttccgctgctggttattgctgataaatctgg  
agccggtgagcgtgggtctcgggtatctcagcactgggccaatggtgaagccctccgtatcgtattatcacagcggggagtcaggcaactatggatgaacgaatatgacag  
atcgtgagataggtgctcactgattaagcattggaactgtcagaccaagttactcatatatactttagattgatitaaacttattttaaattaaaggatcaggatgaagatccttttgataat  
ctcatgacaaaatccctaacgtgagtttctgctcactgagcgtcagaccccgtagaaaagatcaaaagatcctcttgatcctttttctgcgcgtaactctgctctgcaacaaaaaac  
caccgtaccagcgggtgtttgttccggatcaagactaccaactctttccgaaggaactcgtctcagcagagcgcagataccaataactgtctcttagttagcggtagtaggccac  
cactcaagaactctgtgaccgcctacatcctcgtctgtaactcgtftaccagtgctgctgccaatggcgataaagctgctctaccgggttgactcaagacgatgtaccggataa  
ggcgcagcggctggctgaacgggggttctgacacagccagcttggagcgaacgacctacccgaactgagatacctacagcgtgacattgaaagcggccacgcttccgaa  
gggagaaagcggacaggtatccgtaagcggcagggctggaacagagagcgcacgaggagctccaggggaaacgcctgatatattatgctctgctggttccaccctctg  
actgagcgtcattttgtgatcgtcagggggcggagcctatggaaaaacgccagcaacgcgcttttaccggttctggccttttctgctcactgttcttctcctgctt  
cccctgattctgataaccgtattaccctttagtgagctgataccctcggcagccgaacgaccgagcgcagcagcagtcagtgagcaggaagcggaaagcgcctgatcggg  
tatttctcttacgcatctgctggtatttccaccgagaccgcccgtaacctgcaaaatcgggtacggtgagtaataaatggatccctcgtgaaagcgtgtaaaagcactaggactttgttatggctaaag  
gcaaaccttcttctgaagtgcgaattgcccgtctgattaaagggcgctgccaagggcatgtaaaagactatctcggcgttggacaatttaccgaacaactccggccgggaa  
gccgatctcggctgaacgaattgtaggtggcgtactgggtcgatcaaaagtcactcttcccgtatcccaacttggatagagaccactgcggatcgtcaccgtaactgctt  
cacgtagatcacataagaccaagcgttggcctcatgctttaggagattgatgagcgcgtgcaatgcccctgctcgggagactcgaatcatagatatagatctca  
ctacggctgctcaaacctggcagaacgtaagccggagagcgcacaaccgcttctgtcgaaggcagaagcgcgatgaatgcttactacggagcaagttcccgagtaactg  
gagtcggctgattgtggagtaggtgctactctccgaactcacaccgaaaagatcaagagcagcccagtgattgacttggcagggccgagcctacatgtcgaatgatgccca  
tacttgaccacctaactttgttttagggcactgcccctgctgcgtaacatgctgctgctgtaacatgctgctcctcaataacataacatcagaccacggcgtaacgcgcttctgctg  
gatcccgagcagatagctgacaaaaaacagtcatacaagccatgaaaaccgcaactcgcgcttaccaccgctcgttctgctgcaaggttctgaccagttcgtgagcgcatacgt  
actgcaatcagtttcaaccgaacggctttagcaactgggtctgcttctacccgttccaccggtgctgctcaccggcaaccttggcagcagcaagtcagagcatttctcctg

ctggcgaacgagcgcaaggcttccgctccacgcacgctcagcaggcattgcgccctgctgttctctacgcaaggctgctgacggatctccctggctcaggagatcggtagacctg  
gccgtcgccgctgcccgggtgctgacccccgatgaagtgttcgacatctcggtttctggaagcggagatctgttctgccaggactctagctatgctagtgttgccctacg  
taccctagtggctatggcaggcttccccccgacgttggctcgagccctggccctcaccgaactgggggtgggggtgggaaaggaagaacgcccgtattggtccaa  
tggggtctcggtgggtatcgacagagtgccagccctggaccgaacccccggtttatgaacaacgaccaacacccgtcgttttctgtcttttattgccgtatagcggggtctt  
ccggtattgctcttccgtgttcagttagctccccatctcccgttactgtacagctcggagagtgatcccggcgccggfcacgaactccagcaggaccatgtatcggc  
ttctgtggggcttctgctcaggcggactggtgctcagtagtggtgctggcgacgacggggccgctccgatgggggttctctgtgtagtgctggcgagctgacgctgc  
cgtctcgatgttggcggatcgaagtacacttgatcccgtctcgtctgctggccatgatagacgttggtgctgftgtagttgtaclccagcttggccccaggatgtccgtctct  
tgaagtcgatgccctcagctcgaftcggctcaccagggtctggcctcgaactcaccctggcgggctctgtagttccgctccttgaagaagatggctcctggacgtagcctt  
gggatggcgaactgaagaagctgctgctcatgtggctgggtagcggctgaagcactgcacgccgatggcagggtgtcacgaggtggccaggcaccggcagcttggcc  
gtggtcgatgaactcagggtcagcttggcgtagggtgacatccctcggcctcggcggacgcgaacttggcgtttacgtcggctcagctcaccaggatggccaccacc  
cgggaacagctcctcggcttctcaccatgctagtggcaccggctcggctcagcaccagggtgcggctcctcggcaccctgacgtcggcgtgacgggtgaagccgagccgt  
cgtagaaggggagggtgcccggcggaggtctccaggaaggcggcaccggcggcgtcggccgctcactccgggagcagcagcggcctgccagacctgccccgtgt  
gtccggcgagacgcccagcgtgcccaggaaccacggcgtccttggcggggtgcggcgccagggccttccatctgctgtcggcggcagccgggaaccgtcaactggccat  
ggcggggccgatcggcgaacaccggcctcgtcgtcgtcggcgtggttccagaccggcaccggcggcgtcctcggcaccacacctgccgatgacggcggcagcgg  
cgtgaggaagagcttgcagctcgggtgaccggcgtcgtggcgggtcggcgtggtgctggtgctggtggcggggtatgctggcgaaccggcggcgagggtgctacggcccggg  
ggacgtcgtcggggtgagggcaccctgggcttgtactcgtcaggtggctggcggcgctcagcttaagtgcgagactgtgtgacagaagcactgactcgttagcaatftaactgt  
gataactaccgcaataaagcttctgtatgtcgtggttcaataaacgagctctgttatatagacctccaccgtacacgctaccgcccattgtcgaaccggggggttattacgaca  
tttggaaagtcccgttatttggccaaaacaactcccattgacgtcaatggggtggagactggaaatccccgtgagtcacaccgctatccagccccattggttactgccccaaaccg  
atcaccatgtaatagcgatgactaatactagatgtactccaagtaggaaagctccgttaaggtcatgtactggcataatgcccagggcccattaccgctcattgacgtcaataggggg  
ggacttggcatatgatacactgatgactgccaagtgggcagttaccgtaactcaccaccattgactcaatgaaagtcctattggcgttactatggaaacatactcattattgacgtc  
aatggcgggggtcttggcggcagccagcgggcccattaccgtaagttatgaacgggaactccatataatggctatgaactaatgacccgtaattgattactataaactatcga  
gttggctaatgagaattgtcgtgccagttgatcagcgaagcggagatgctgggttggcgtgcccftcaatattgcatactcttctgactcatctgatgccagatggtgggtctaa  
aacgggagagttatctcactcftggtgacgcacacatttataataaccacattgaggtgtaaaagagcagttgtcccgtccttagaccattccctaaagtggagtttfaatggctcag  
aaaaaatggagcttactatcgacatgtttatcttgagggtatcaaccacagctgaaactgcagatgaaaatggctgtttgaatcagttaaaggaattctgttactcattatcctaga  
aatgggtaatcgtgttggcgggacatattgtgtatataagcccgtttagctcctcagtcacaagagcgcacacacacgcttataactagctctctcctccactcaaggaaatc  
aaaggcctacgtcagcagctcactatgctcggccgcttgaactagaacctgcagctcgcacaagcttgcgagaagtactagaggatcaatacagccataaccattgtagaggttt  
actgtttaaaaacctcccacacctccccgaacctgaaacataaaaatgaatgcaattgtgtgttaactgtttattgcagcttataatggttacaataaagcaatgacacaaaatfcac  
aaataaagcatttttctcactcatttagtgggtttgcaaacatcaatgtatcttatcgtctggtatctgacactgcttggcctaggagatccgaaccagataagtaaatctagtcca  
aactatttgcattttattttctattagcttacagcgtacaccagttcccatctattttgactcttccctaaataatccttaaaaactccattccaccctcccagttccaactattttgctc  
ccccacggggcattttttctctgtattgttttaatacaaacatcctgccaactccatgcaaaaacctcatcttccgctactt

### Supplementary Figure 3

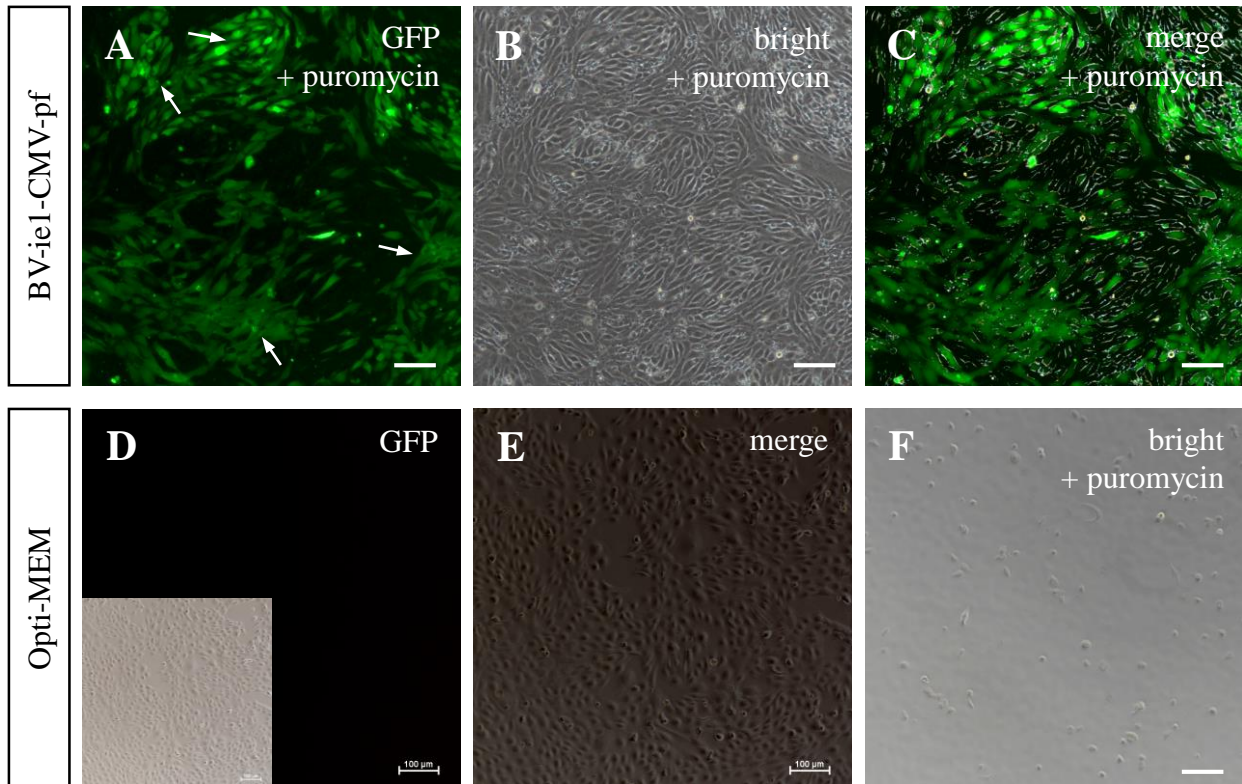

**Supplementary Figure 3.** ZF4 cells transduced with modified baculovirus BV-ie1-CMV-pf. (A-C), ZF4 cell transduced with BV-ie1-CMV-pf where a puromycin-egfp (*pf*) cassette was driven by a CMV promoter at a MOI of 32.5, and cells were treated with 1  $\mu\text{g}/\text{mL}$  puromycin continuously for 3 days after 2 days post-transduction. Cells grown quite well under the selection pressure, and arrows indicated that GFP positive cells were in clusters and becoming stable. (D, E), ZF4 cells treated with opti-MEM medium, (F), and selected with 1  $\mu\text{g}/\text{mL}$  puromycin for 2 days. The expression of GFP was observed under an inverted fluorescence microscope. Scale bar = 100  $\mu\text{m}$ .

**Supplementary Table.** Primers used in this study.

| Gene/Cassette      | Accession number. | Forward primer/Reverse primer (5'-3') |                                                                                      | Tm | Size (bp) |
|--------------------|-------------------|---------------------------------------|--------------------------------------------------------------------------------------|----|-----------|
| WSSV ie1 promoter  | AF369029.2        | PIE1F                                 | <u>gctgctagcaccatggctcag</u> TGTGGCTAATGGAGAATTG                                     | 52 | 501       |
|                    |                   | PIE1R                                 | tcgacgtaggcctttgaattcCTTGAGTGGAGAGAGAGC                                              | 53 |           |
| CMV promoter 1     |                   | PMF                                   | agcaccatggctcagGATCTGACGGTTCACTAAACGA                                                | 57 | 621       |
|                    |                   | PMR                                   | taatcggtgtgagctGATCAATAATTATCATTAGTTAATGCCC                                          | 54 |           |
| CMV-pf             |                   | PPF                                   | ctccccatctcccgCTTTACTTGTACAGCTCGTC                                                   | 53 | 2046      |
|                    |                   | PPR                                   | taatcggtgtgagctGATCAATAATTATCATTAGTTAATGCCC                                          | 54 |           |
| <i>oct4</i>        | KY994571          | Oct4F                                 | ccgtcagatcctcgaATGACGGAGAGACCGCAGAGC                                                 | 63 | 1468      |
|                    |                   | Oct4R                                 | gtcaccgcatgttagaagacttctctgcctcGCTGGTGAGGTGACCCACCA                                  | 64 |           |
| <i>sox2</i>        | KY994572          | Sox2F                                 | ctaacatgcggtgacgtggaggagaatcccggcctATGTACAACATGATGGAAACCG                            | 56 | 1001      |
|                    |                   | Sox2R                                 | ctccccatctcccgTTACATATGCGATAAGGGAATCGT                                               | 57 |           |
| <i>klf4</i>        | KY994573          | Klf4F                                 | gctaccggactcagATGAGGCAGCCACCAAGTGAG                                                  | 62 | 1322      |
|                    |                   | Klf4R                                 | agctgtgtgaattcagggccgggattctctccacgtcaccgcatgttagaagacttctctgcctcTAGGTGCCGTTTCATGTGC | 58 |           |
| CMV promoter 2     |                   | CMVF                                  | agtacatcaagtgtatcatagcggccgcTAGTTATTAATAGTAATCAATT                                   | 60 | 638       |
|                    |                   | CMVR                                  | ctcacttggtggtgcctcatCTGAGTCCGGTAGC                                                   | 58 |           |
| <i>oct4-detect</i> | KY994571          | Oct4-F                                | ACTGTACTTCGGCACATTCGT                                                                | 59 | 400       |
|                    |                   | Oct4-R                                | GCGCTCGGAACTTGTATGGC                                                                 | 61 |           |
| <i>sox2-detect</i> | KY994572          | Sox2-F                                | TCATGCCGTAGCCTCCGTTG                                                                 | 62 | 385       |
|                    |                   | Sox2-R                                | TCAAGAGACCCATGAACGCCTT                                                               | 61 |           |
| <i>klf4-detect</i> | KY994573          | Klf4-F                                | CCTGCGTATCTTCAGTCCAC                                                                 | 57 | 399       |
|                    |                   | Klf4-R                                | GCGGAAAGCCAGAGTAACCC                                                                 | 60 |           |
| <i>myc-detect</i>  | KY994574          | Myc-F                                 | ACGACTACGATTCCTACCAGC                                                                | 58 | 312       |
|                    |                   | Myc-R                                 | ACCCGCTCCACATACAGTCC                                                                 | 61 |           |
| $\beta$ -actin     | NM_001104808      | Actin-F                               | CATGTACCCTGGCATTGCT                                                                  | 57 | 382       |
|                    |                   | Actin-R                               | CTCCCCTGTTAGACAACCTACCTC                                                             | 58 |           |
| <i>pr</i>          |                   | Pr-F                                  | TGAACGGCCACGAGTTCGAGA                                                                | 63 | 221       |
|                    |                   | Pr-R                                  | GCGCTCCCCTTGAAGCCCTC                                                                 | 65 |           |

Capital letters indicated the oligonucleotides specific binding to the templates. The underscores were the sites for restriction digest.
